# Supplementary material for: Enhancing surface characteristics of Ti–6Al–4V for bio-implants using integrated anodization and thermal oxidation
Source: Royal Society of Chemistry journal article supplement (doi:10.1039/c3tb21731k), 2014-01-01
Supplement: c3tb21731k1.pdf [file c3tb21731k1.pdf]

## Supporting Information

### Enhancing Surface Characteristics of Ti-6Al-4V for Bio-Implants Using Integrated Anodization and Thermal Oxidation

Sweetu B. Patel<sup>a</sup>, Azhang Hamlekhan<sup>b</sup>, Dmitry Royhman<sup>c</sup>, Arman Butt<sup>a</sup>, Judy Yuan<sup>c</sup>, Tolou Shokuhfar<sup>b,d</sup>, Cortino Sukotjo<sup>c</sup>, Mathew T. Mathew<sup>e</sup>, Gregory Jursich<sup>a</sup>, Christos G. Takoudis<sup>a,f,\*</sup>

<sup>a</sup> Department of Bioengineering, University of Illinois at Chicago, Chicago, Illinois 60607, USA

<sup>b</sup> Department of Mechanical Engineering, Michigan Technological University, Houghton, Michigan 49931, USA,

<sup>c</sup> Department of Restorative Dentistry, University of Illinois at Chicago, Chicago, Illinois 60612, USA

<sup>d</sup> Department of Physics, University of Illinois at Chicago, Chicago, Illinois 60612, USA

<sup>e</sup> Department of Orthopaedic Surgery, Rush University Medical Center, Chicago, Illinois 60612, USA

<sup>f</sup> Department of Chemical Engineering, University of Illinois at Chicago, Chicago, Illinois 60607, USA

\* [takoudis@uic.edu](mailto:takoudis@uic.edu)

1. External surface morphologies of smooth, rough, anodized-smooth and anodized rough samples.

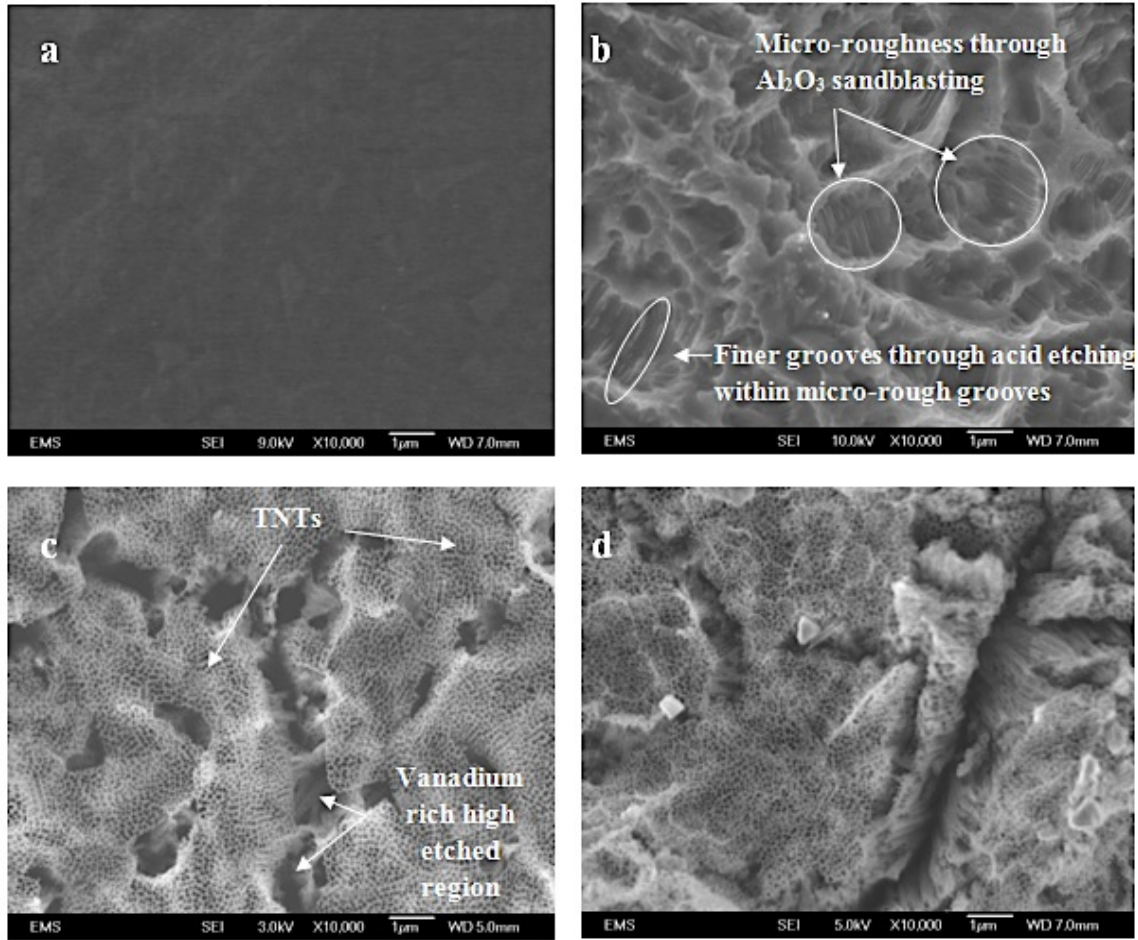

**Figure S1.** FE-SEM images of Ti-6Al-4V samples before TO possessing different surface topographies with X10k magnification and 1  $\mu\text{m}$  scale a) smooth, b) rough (sandblasted with  $\text{Al}_2\text{O}_3$ , and acid etched in  $\text{H}_2\text{SO}_4$  and  $\text{H}_2\text{O}_2$ ), c) anodized smooth, and d) anodized rough; Anodization was performed in a solution mixture of EG,  $\text{NH}_4\text{F}$ , and  $\text{H}_2\text{O}$  at 60 V for 4 hours.

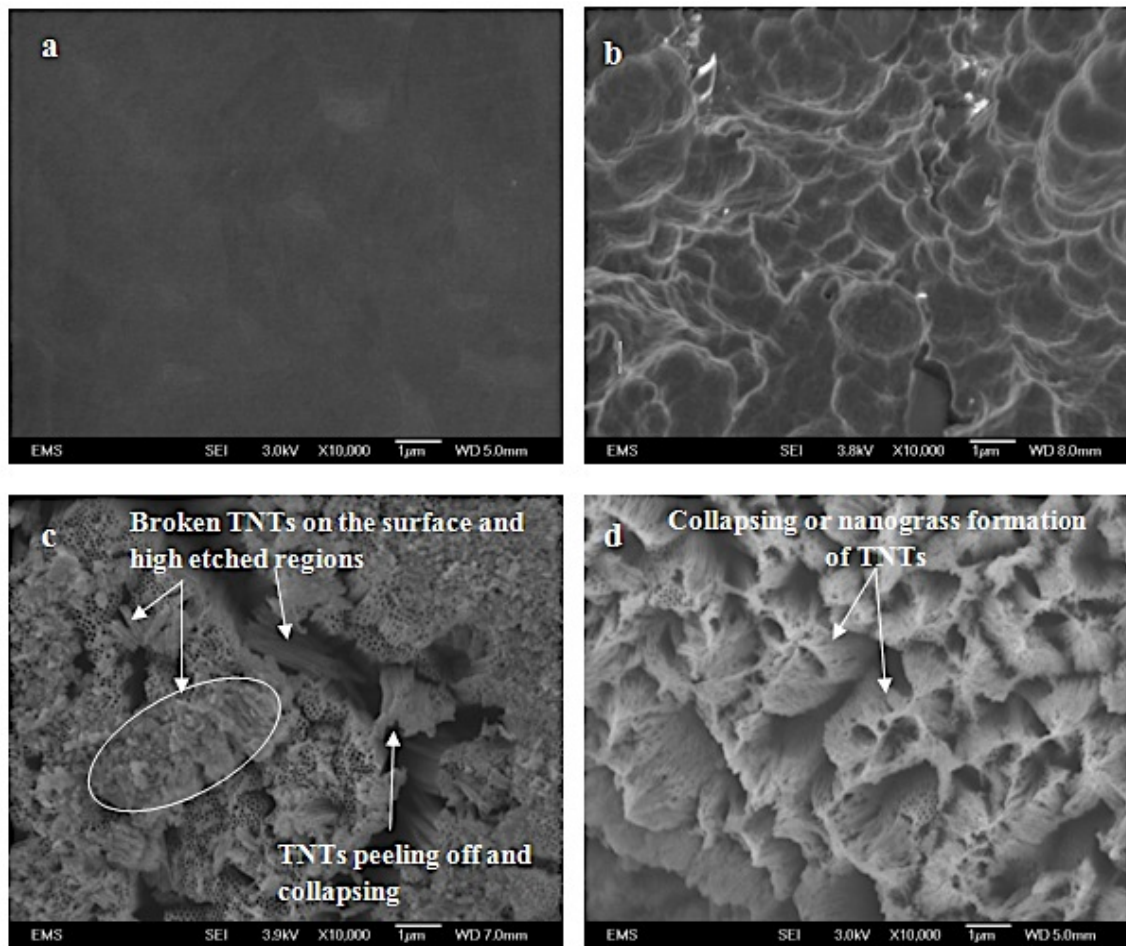

**Figure S2.** FE-SEM images of Ti-6Al-4V samples after TO (450 °C, 3 hours) possessing different surface topographies with X10k magnification and 1  $\mu\text{m}$  scale a) smooth, b) rough sample, c) anodized smooth, and d) anodized rough; Rough and anodized samples were prepared using same condition as that in Figure S1.

## 2. Surface composition of rough and anodized-rough Ti-6Al-4V samples

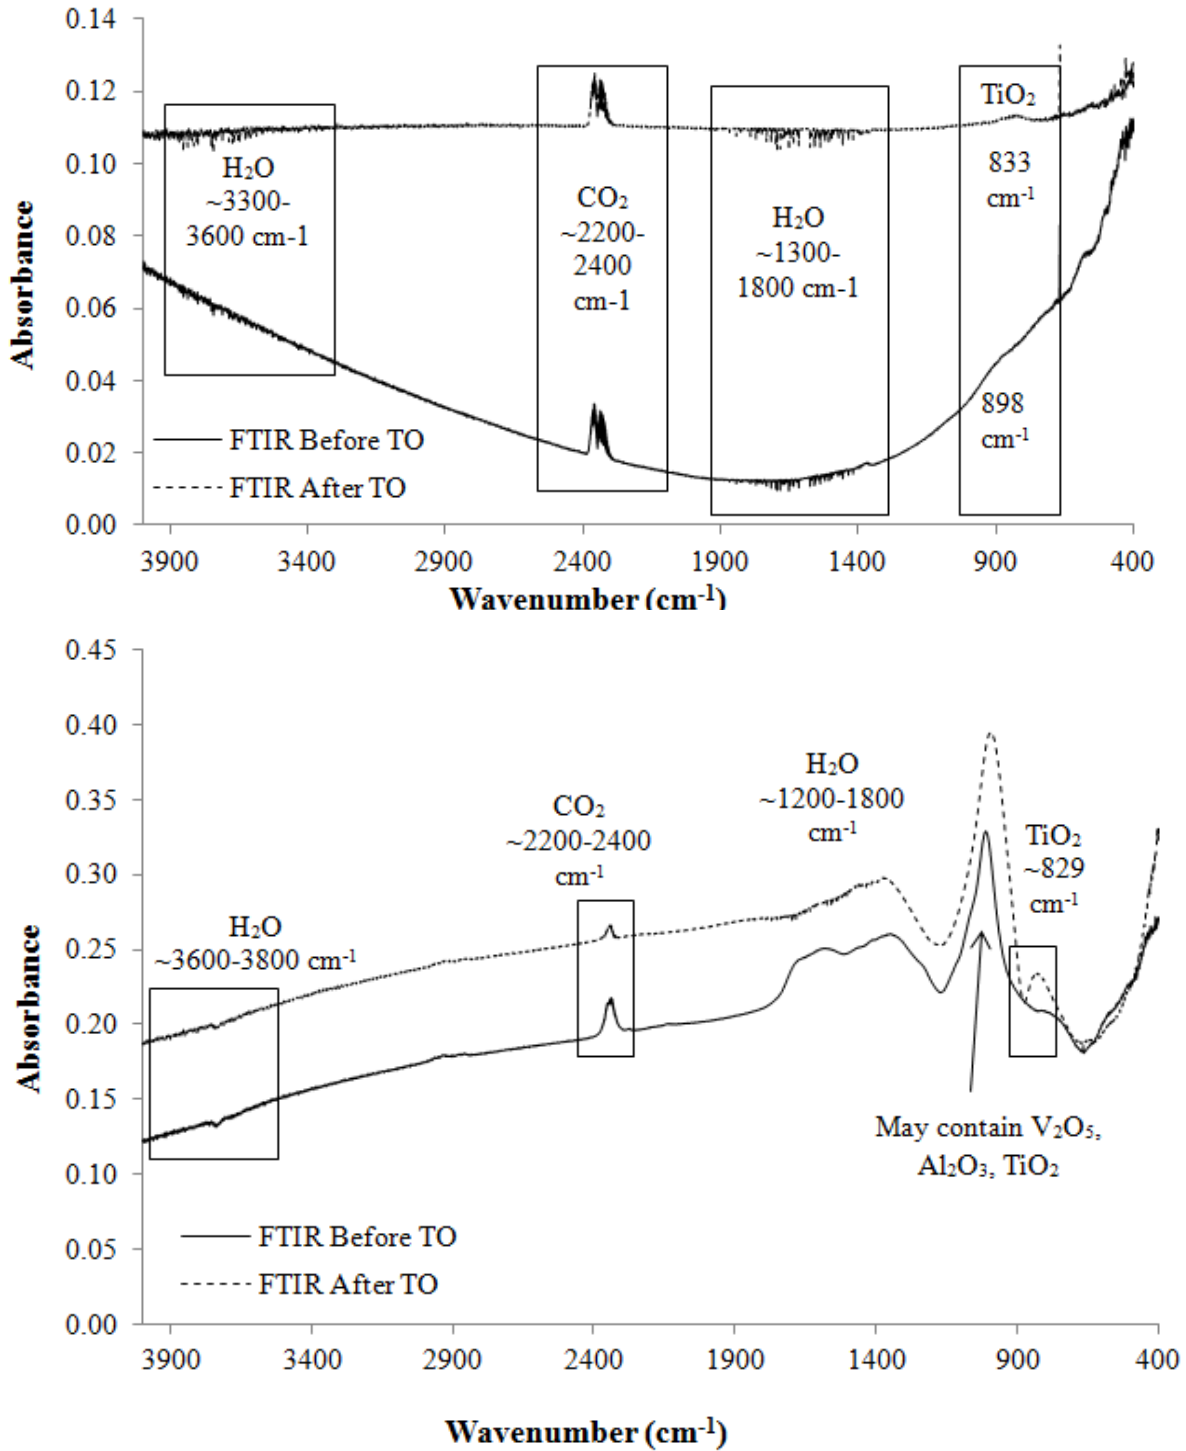

**Figure S3.** FTIR spectra of rough (a) and anodized-rough (b) Ti-6Al-4V samples before (solid line) and after (dashed line) thermal oxidation at 450 °C for 3 hrs.

### 3. Surface TiO<sub>2</sub> crystallinity of smooth Ti-6Al-4V samples

Ti-6Al-4V samples were first polished and then were divided into three groups: control, 450 °C and 600 °C heat-treated samples for 3 hours (step by step procedure is provided in the experimental section of manuscript). To investigate the surface crystallinity of TiO<sub>2</sub> formed from thermal oxidation, grazing incidence X-ray diffraction (GIXRD) was performed (details are provided in the revised manuscript).

Figure 4S shows the GIXRD spectrum of control, 450 °C and 600 °C heat-treated samples along with the PDF#'s for titanium, anatase and rutile. It is observed that i) the rutile peaks at 2-theta of 27.447 (110) and 54.323 (211) appear for Ti-6Al-4V 600 °C heat-treated samples, and ii) the rutile peak intensities at 2-theta of 36.086 (101), 39.187 (200), and 62.742 (002) increase for 600 °C heat-treated samples when compared to 450 °C heat-treated samples, indicating crystallization of TiO<sub>2</sub> to rutile. Previously, E. Gemelli *et al.* performed XRD on heat-treated Ti-6Al-4V samples at temperatures ranging from 400-800 °C for much longer durations than that used in this study, that is 48 hours. No anatase peak at 2-theta of 25.303 (1 0 1) was observed for 400 °C treated samples; however, similar to this study, there was a peak observed at about 2-theta of about 38.1, which indicates the presence of anatase TiO<sub>2</sub>.<sup>[1]</sup> Additionally, H. Guleryuz *et al.* investigated similar behavior of heat-treated Ti-6Al-4V samples at 600 °C for much longer duration than the one used in here, that is for 12 and 48 hours. A relatively low intensity was observed at 2-theta of 25.303 (1 0 1) for anatase and 27.447 (110) for rutile even after 12 hours of heat-treatment.<sup>[2]</sup> The above mentioned studies corroborate the GIXRD analysis performed in this study, which indicates the presence of anatase from

the peak observed at 2-theta of 37.790 (0 0 4), albeit without a peak at 2-theta of 25.303 (1 0 1).

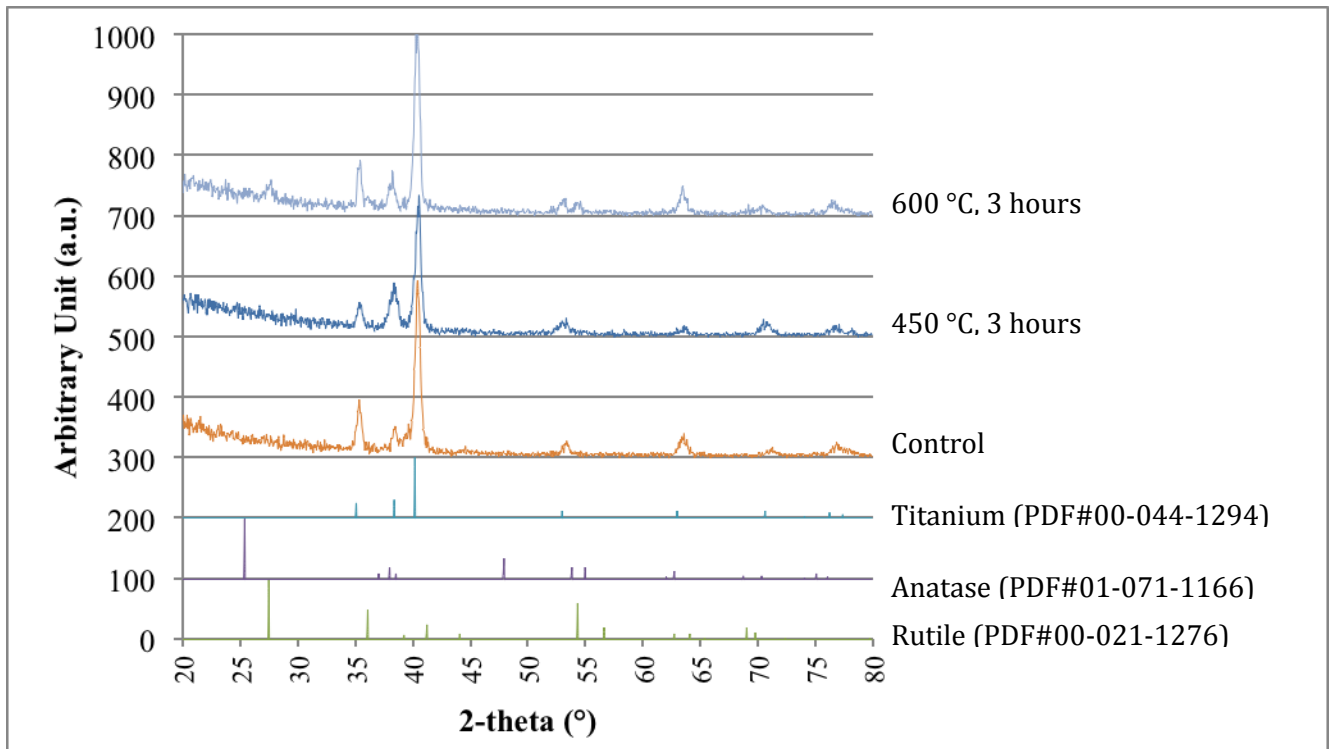

**Figure S4:** GIXRD spectra of Ti-6Al-4V for control (non-treated sample), 450 °C and 600 °C heat-treated samples for 3 hours in ambient environment. XRD baselines for titanium, anatase TiO<sub>2</sub>, and rutile TiO<sub>2</sub> are also provided.

## References

1. Gemelli, E. and N.H.A. Camargo, *Oxidation kinetics of commercially pure titanium*. Matéria (Rio de Janeiro), 2007. **12**: p. 525-531.
2. Guleryuz, H. and H. Cimenoglu, *Oxidation of Ti-6Al-4V alloy*. Journal of Alloys and Compounds, 2009. **472**(1-2): p. 241-246.
